# Supplementary material for: Inhibition of Jagged-mediated Notch signaling disrupts zebrafish biliary development and generates multi-organ defects compatible with an Alagille syndrome phenocopy
Source: Oxford University Press journal article supplement (doi:10.1242/dev.01411), 2004-10-28
Supplement: dev01411supptables.pdf [file dev01411supptables.pdf]

**Table S1. Cardiac edema in *jagged* 2/3 morphants, with and without co-injection of human *Jagged 1* mRNA**

| Morphants                            | Cardiac edema | No cardiac edema |
|--------------------------------------|---------------|------------------|
| J2+3 ( <i>n</i> =144)                | 127 (88%)     | 17 (12%)         |
| J2+3 + human J1 mRNA ( <i>n</i> =33) | 4 (12%)       | 29 (88%)         |

**Table S2. Phenotypic abnormalities in *jagged*, *notch*, and compound *jagged* and *jagged/notch* morphant larvae**

| Morphant     | Biliary | Cardiac edema | Pancreas | Kidney | CF | Small ears |
|--------------|---------|---------------|----------|--------|----|------------|
| <i>J1</i>    | -       | -             | -        | NA     | -  | +          |
| <i>J2</i>    | +       | +*            | +*       | NA     | -  | -          |
| <i>J3</i>    | -       | -             | -        | NA     | +  | +          |
| <i>J1+2</i>  | +       | +             | -        | NA     | -  | +          |
| <i>J1+3</i>  | -       | -             | -        | NA     | +  | +          |
| <i>J2+3</i>  | +       | +             | +        | +      | +  | +          |
| <i>N2</i>    | -       | -             | -        | NA     | -  | -          |
| <i>N5</i>    | +       | +             | -        | NA     | -  | -          |
| <i>N2+5</i>  | +       | +             | +        | +      | -  | -          |
| <i>J2+N2</i> | +       | +             | +        | NA     | -  | -          |
| <i>J2+N5</i> | +       | +             | +        | NA     | -  | -          |
| <i>J3+N2</i> | -       | +             | -        | NA     | +  | +          |
| <i>J3+N5</i> | +       | +             | +        | NA     | +  | +          |

+, indicated phenotype present in 80-100% of injected 5-dpf larvae.

-, indicated phenotype present in 0-5% of injected 5-dpf larvae.

NA, larvae not analyzed for indicated phenotype.

CF, craniofacial defects.

\*Present only in morphants injected with high doses of morpholino.
